# Supplementary material for: Diagnostic testing for galactose-alpha-1,3-galactose, United States, 2010 to 2018
Source: PubMed Central journal article supplement — Ann Allergy Asthma Immunol. Author manuscript; Available in PMC 2024 Mar 25. (PMC10961706; doi:10.1016/j.anai.2020.12.019), 2021-01-07
Supplement: NIHMS1973717-supplement-1.pdf [file NIHMS1973717-supplement-1.pdf]

**Supplementary Data****eTable 1**  
Number of Persons Tested for Alpha-Gal Immunoglobulin E and Number of Positive per 100,000 Population by State of Origin—United States, 2010 to 2018

| State                | Number of persons tested | Number of persons positive | Number of persons positive per 100,000 population |
|----------------------|--------------------------|----------------------------|---------------------------------------------------|
| Alabama              | 857                      | 222                        | 0.57                                              |
| Alaska               | 15                       | 2                          | 0.07                                              |
| Arizona              | 15                       | 1                          | 0.00                                              |
| Arkansas             | 2,215                    | 1,128                      | 4.70                                              |
| California           | 330                      | 17                         | 0.01                                              |
| Colorado             | 153                      | 15                         | 0.05                                              |
| Connecticut          | 244                      | 41                         | 0.19                                              |
| Delaware             | 46                       | 21                         | 0.44                                              |
| District of Columbia | 104                      | 10                         | 0.29                                              |
| Florida              | 1,444                    | 209                        | 0.20                                              |
| Georgia              | 1,300                    | 352                        | 0.42                                              |
| Hawaii               | 0                        | 0                          | N/A                                               |
| Idaho                | 9                        | 0                          | 0.00                                              |
| Illinois             | 1,326                    | 456                        | 0.59                                              |
| Indiana              | 1,122                    | 330                        | 0.83                                              |
| Iowa                 | 147                      | 14                         | 0.09                                              |
| Kansas               | 1,155                    | 232                        | 1.14                                              |
| Kentucky             | 2,375                    | 1,093                      | 3.07                                              |
| Louisiana            | 196                      | 24                         | 0.10                                              |
| Maine                | 34                       | 7                          | 0.13                                              |
| Maryland             | 2,519                    | 831                        | 1.73                                              |
| Massachusetts        | 1,004                    | 73                         | 0.15                                              |
| Michigan             | 206                      | 7                          | 0.01                                              |
| Minnesota            | 925                      | 91                         | 0.27                                              |
| Mississippi          | 1,077                    | 393                        | 2.19                                              |
| Missouri             | 3,289                    | 1,380                      | 2.51                                              |
| Montana              | 57                       | 4                          | 0.06                                              |
| Nebraska             | 24                       | 2                          | 0.02                                              |
| Nevada               | 23                       | 1                          | 0.01                                              |
| New Hampshire        | 175                      | 21                         | 0.31                                              |
| New Jersey           | 666                      | 155                        | 0.25                                              |
| New Mexico           | 12                       | 0                          | 0.00                                              |
| New York             | 2,659                    | 1,305                      | 0.73                                              |
| North Carolina       | 3,760                    | 1,218                      | 1.48                                              |
| North Dakota         | 95                       | 5                          | 0.22                                              |
| Ohio                 | 173                      | 57                         | 0.08                                              |
| Oklahoma             | 1,942                    | 628                        | 2.66                                              |
| Oregon               | 68                       | 2                          | 0.01                                              |
| Pennsylvania         | 368                      | 43                         | 0.06                                              |
| Rhode Island         | 107                      | 7                          | 0.13                                              |
| South Carolina       | 654                      | 113                        | 0.28                                              |
| South Dakota         | 19                       | 4                          | 0.11                                              |
| Tennessee            | 3,436                    | 1,153                      | 1.91                                              |
| Texas                | 605                      | 54                         | 0.03                                              |
| Utah                 | 62                       | 5                          | 0.03                                              |
| Vermont              | 71                       | 6                          | 0.24                                              |
| Virginia             | 8,261                    | 3,303                      | 4.35                                              |
| Washington           | 78                       | 6                          | 0.01                                              |
| West Virginia        | 164                      | 14                         | 0.15                                              |
| Wisconsin            | 236                      | 35                         | 0.12                                              |
| Wyoming              | 9                        | 1                          | 0.06                                              |

Abbreviations: Alpha-gal, galactose-alpha-1,3-galactose; IgE, immunoglobulin E; N/A, not available.
